# Supplementary material
Source: publisher site journal article supplement (https://www.dovepress.com/get_supplementary_file.php?f=238559.docx)
Supplement: Supplementary file 1 [file get_supplementary_file.php]

**Supplementary Information**

Table S1. Oligonucleotide primers used in the study

| **Target gene** | **Sequence (5′–3′)** | **Annealing** | **Size (bp)** | **Reference** |
| --- | --- | --- | --- | --- |
| *ipaH* | F: TGGAAAAACTCAGTGCCTCT  R: GAACCAGTCCGTAAATTCATTCT | 53 °C | 425 | [40] |
| *ipaB* | F: CAAGCCCTGAATCCGATCAT  R: TGTTTACCAACAGTGGCTAC | 53 °C | 194 | Designed in this study |
| *ipaC* | F: GGGATGCTTCCTCTGCTTGT  R: CCTAGCAGCCCTATCATCAAG | 55 °C | 518 | Designed in this study |
| *ipaD* | F: AAGAAGCCGAGCTTGATGGA  R: CCTCGCCATTTCCACCTAGA | 55 °C | 450 | Designed in this study |
| *ipgD* | F: TCTTATACAAATGACGAATACCC  R: ATTGTAAGAGTGGGAAGGACA | 51 °C | 307 | [41] |
| *Sen (ShET-2)* | F: GCGATGCGTATGGGATTGAC  R: CTCCCATTCCTTCCGCAGTT | 57 °C | 244 | Designed in this study |
| *virA* | F: GCCTGCACCAGAAGTTATTG  R: AGTGTCGTTTTTAGGGACAACT | 54 °C | 550 | Designed in this study |

Figure S1. Agarose gel electrophoresis showing presence of *ipaB* in *Shigella* isolates from pediatric patients.


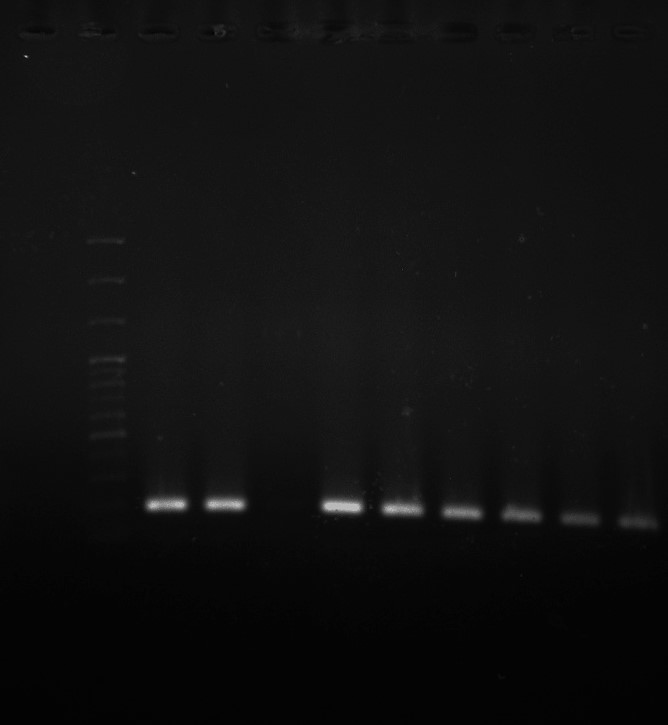


194 bp

C+

C-

L

6

4

5

7

8

3

3

2

1

C-, negative control; L, 100 bp molecular size marker; C+, positive control for *ipaB* gene; lane 1-8, clinical isolates of *Shigella* strains.

Figure S2. Agarose gel electrophoresis showing presence of *ipaD* in *Shigella* isolates from pediatric patients.


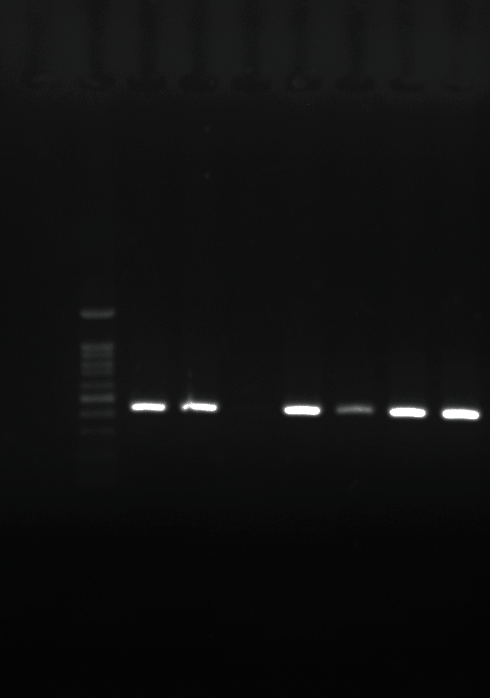


450 bp

L

C+

6

5

4

1

2

3

C-

C-, negative control; L, 100 bp molecular size marker; C+, positive control for *ipaD* gene; lane 1-6, clinical isolates of *Shigella* strains.

Figure S3. Agarose gel electrophoresis showing presence of *ipaH* in *Shigella* isolates from pediatric patients.


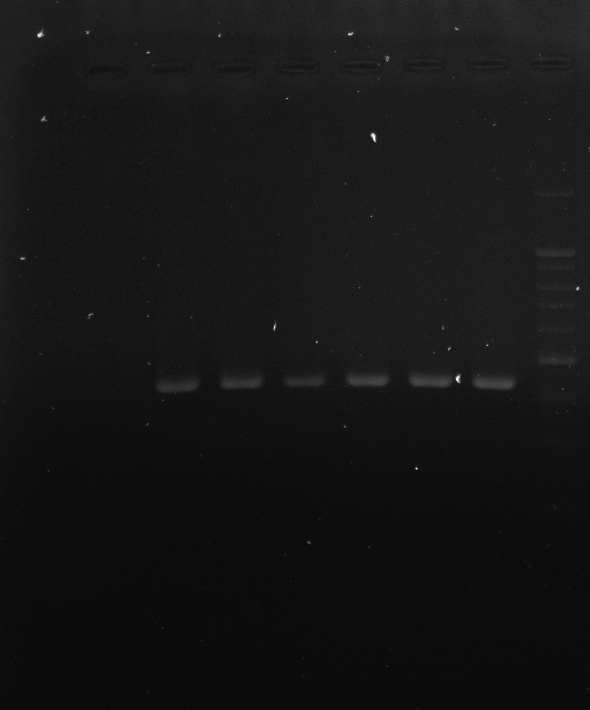


425 bp

L

4

C+

1

3

5

2

C-

C-, negative control; L, 100 bp molecular size marker; C+, positive control for *ipaH* gene; lane 1-5, clinical isolates of *Shigella* strains.

Figure S4. Agarose gel electrophoresis showing presence of *IpgD* in *Shigella* isolates from pediatric patients.

C+

1

2

C-


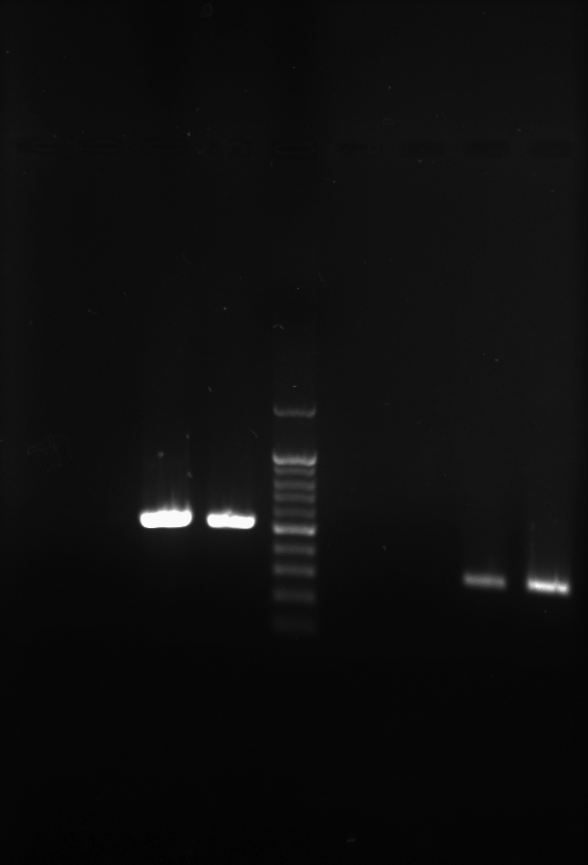


307 bp

C+

1

2

L

C-

C-, negative control; L, 100 bp molecular size marker; C+, positive control for *IpgD* gene; lane 1 and 2, clinical isolates of *Shigella* strains.

Figure S5. Agarose gel electrophoresis showing presence of *ipaC* in *Shigella* isolates from pediatric patients.

C+

C-

L

518 bp

1

2

1

2

C+


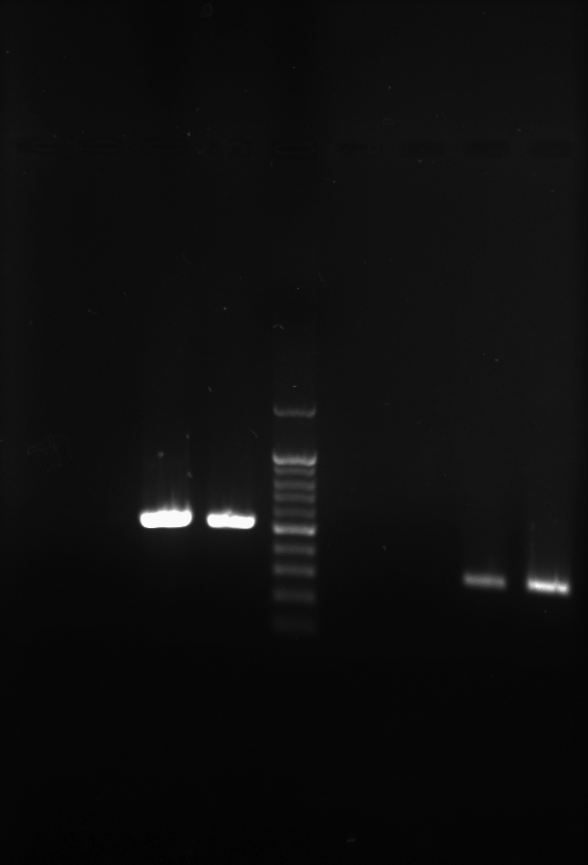


C-, negative control; L, 100 bp molecular size marker; C+, positive control for *ipaC* gene; lane 1 and 2, clinical isolates of *Shigella* strains.

Figure S6. Agarose gel electrophoresis showing presence of *sen* in *Shigella* isolates from pediatric patients.


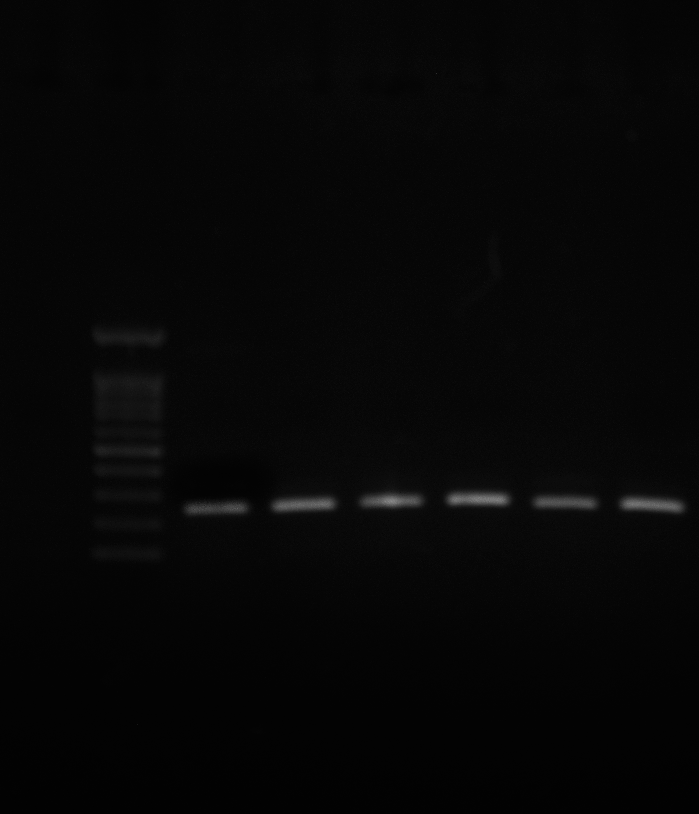


L

5

4

3

2

1

C-

C+

244 bp

C-, negative control; L, 100 bp molecular size marker; C+, positive control for *sen* gene; lane 1-5, clinical isolates of *Shigella* strains.

Figure S7. Agarose gel electrophoresis showing presence of *virA* in *Shigella* isolates from pediatric patients.


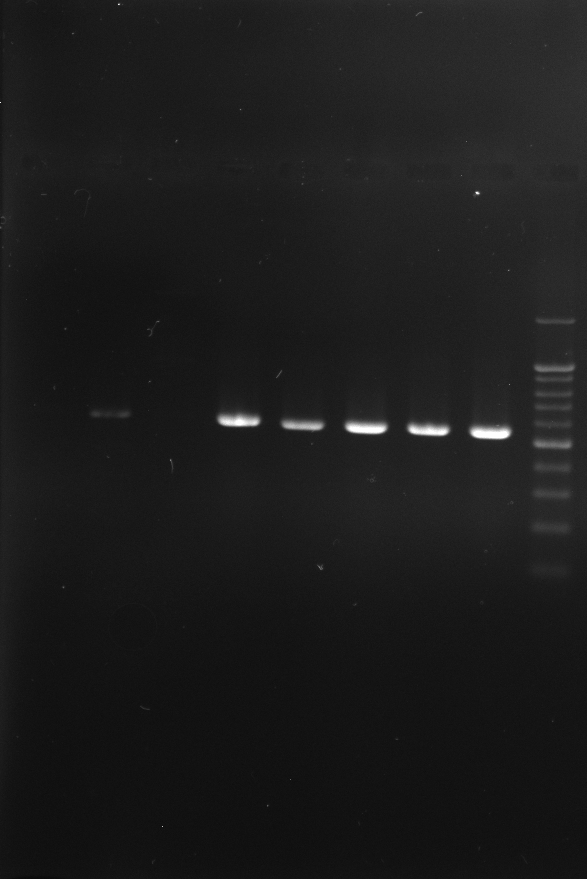


550 bp

L

C-

6 5 4 3 2 1

C+

C-, negative control; L, 100 bp molecular size marker; C+, positive control for *virA* gene; lane 1-6, clinical isolates of *Shigella* strains.

C-

6

5

4

3

2

1

C+

L
